# Supplementary material
Source: Springer Nature journal article supplement (https://www.springerprofessional.de/resource/supplementary/13638_2012_767_MOESM13_ESM.pdf/11898388)

**Symmetric  
ranges**

TS138  
TYÖASENÄL  
71.8 m<sup>2</sup>  
7310

TS11  
P2AS  
73.4  
74.9

TS135  
PC-LUOKKA  
91.8 m<sup>2</sup>  
98.4

6.60m

3.17m

1.24m

TS132  
ALLA  
285.5  
287.4

Rx7 6.82m

TxR23

+4.6

LOH103 D30V/ H01L103 E00 (int.) 4x1m

PUN

111

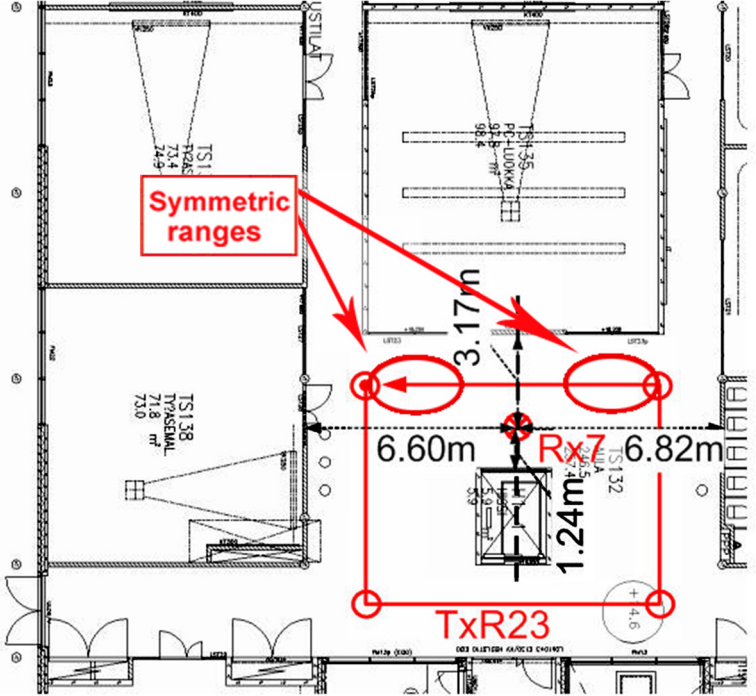

Supplement: MOESM13 [file 11898388]
